# Supplementary material for: A laser microdissection-based axotomy model incorporating the use of biomimicking fiber scaffolds reveals that microRNAs promote axon regeneration over long injury distances
Source: Royal Society of Chemistry journal article supplement (doi:10.1039/d0bm01380c), 2020-01-01
Supplement: d0bm01380c1.pdf [file d0bm01380c1.pdf]

### Supporting information

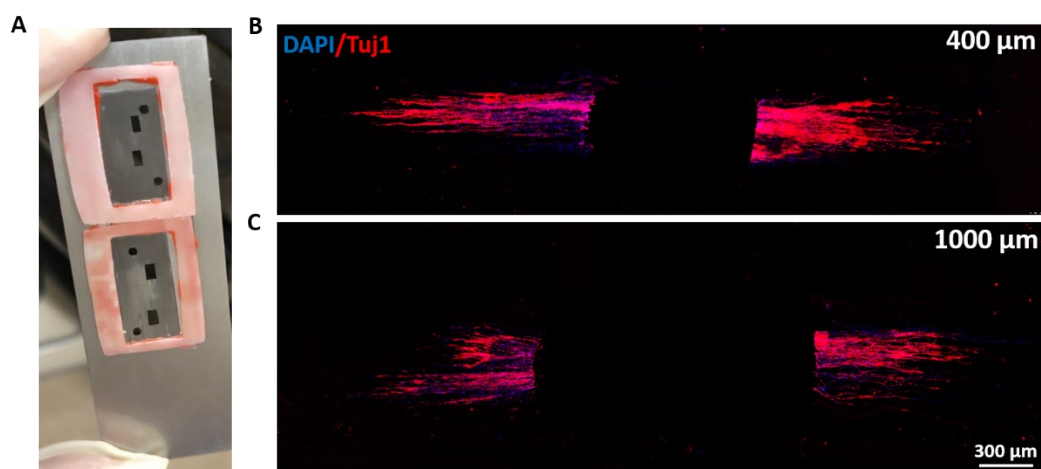

**Figure S1.** The leftover DRGs after axotomy. (A) The leftover DRGs on the scaffold after laser microdissection. (B) Representative fluorescent image of leftover DRGs axotomized at 400  $\mu\text{m}$  away from the DRG soma. (C) Representative fluorescent image of leftover DRGs axotomized at 1000  $\mu\text{m}$  away from the DRG soma.

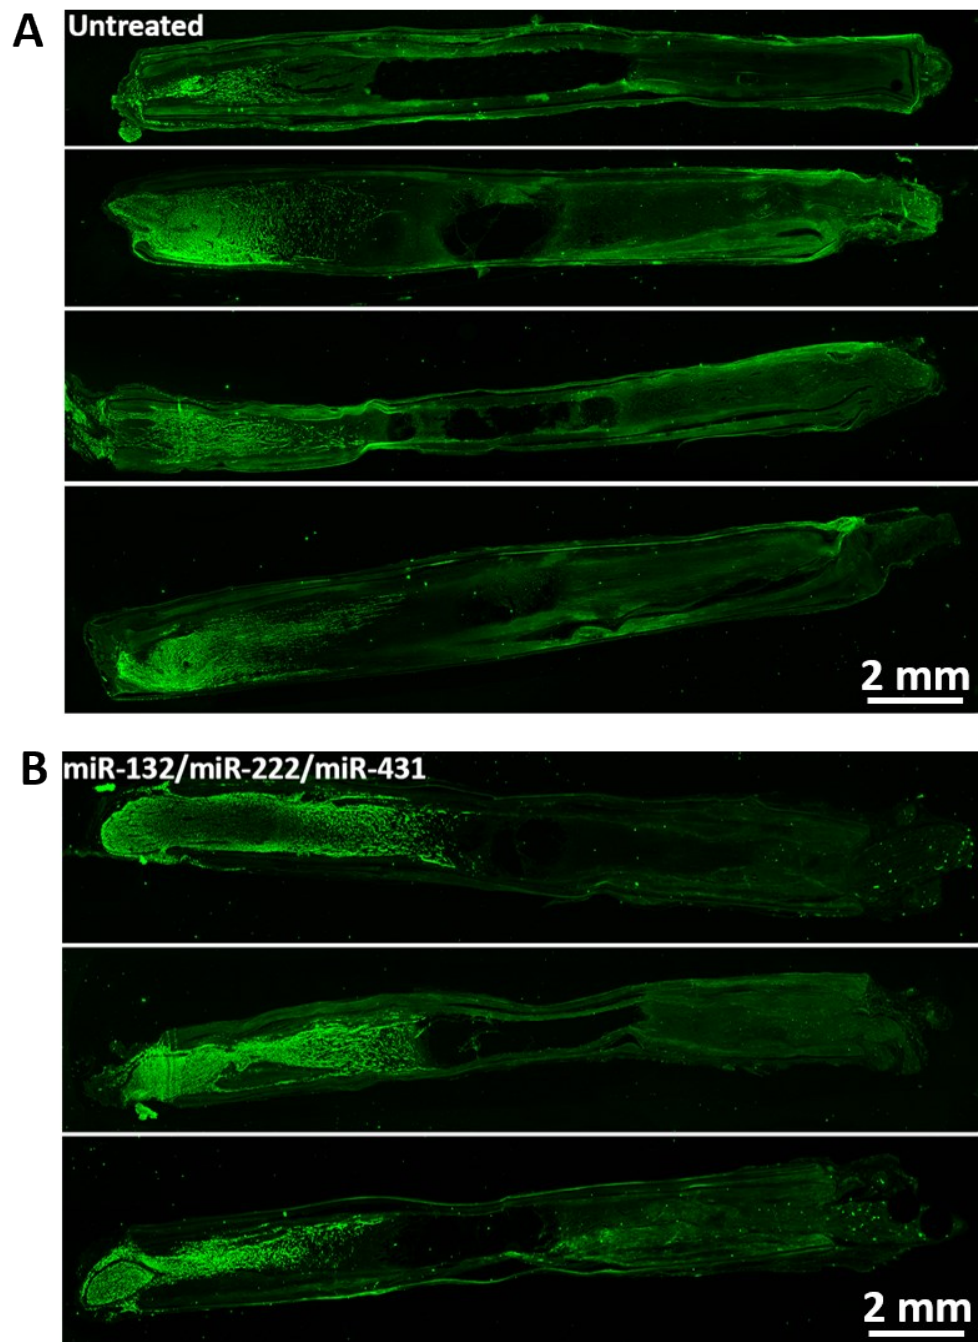

**Figure S2.** NF200 staining in both untreated and miR-132/miR-222/miR-431-treated samples. (A) All the untreated samples which were stained with NF200. (B) All the miR-132/miR-222/miR-431-treated samples that were stained with NF200.
